# Supplementary material
Source: PubMed Central journal article supplement (PMC3406872)
Supplement: 1204623109_pnas.1204623109_SI.pdf [file 1204623109_pnas.1204623109_SI.pdf]

# Supporting Information

Jia et al. 10.1073/pnas.1204623109

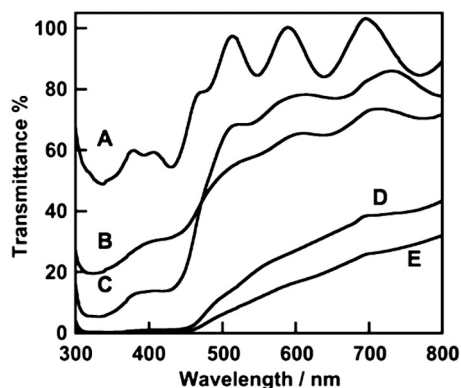

Fig. S1. UV-Vis. transmission spectra of  $\text{BiVO}_4$  thin film electrodes prepared by calcination at 673 K for 2 h. Concentration of precursor solution, (A) 20  $\text{mmol L}^{-1}$ , (B) 50  $\text{mmol L}^{-1}$ , (C) 50  $\text{mmol L}^{-1}$ , (D) 200  $\text{mmol L}^{-1}$ , and (E) 300  $\text{mmol L}^{-1}$ .

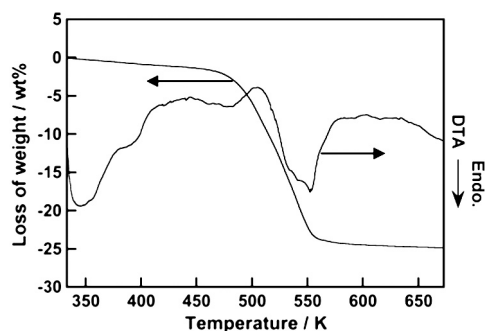

Fig. S2. Thermogravimetric-differential thermal analysis for precursor of  $\text{BiVO}_4$  thin film. Rate of temperature rising, 10  $\text{K min}^{-1}$ .

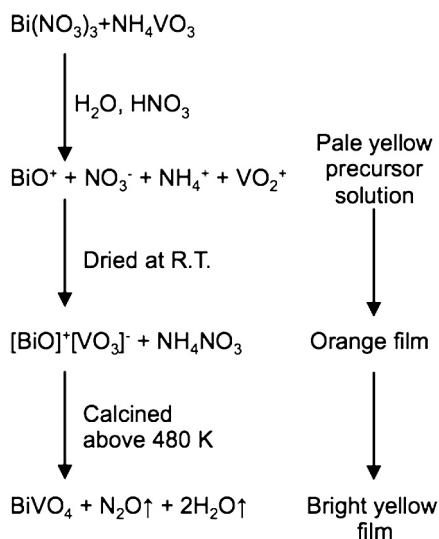

Fig. S3. Main formation process of  $\text{BiVO}_4$  thin film from a precursor solution.
